# Supplementary material for: Pathway Specific Activation of D1 And D2 Medium Spiny Neurons in a CRE Mouse Model Reveals Distinct Roles in Reinforcement Learning and Decision Making via Closed Loop Optogenetic Neuromodulation
Source: Research Square preprint supplement (doi:10.21203/rs.3.rs-7794302/v1), 2025-12-01
Supplement: Supplementary file 1 [file aebf86ccb94aa10490fa006a.docx]

**Supplementary Materials**

**A). *Injection Surgery***To achieve targeted, pathway-specific optogenetic modulation of striatal neurons, we performed bilateral viral injections of a Cre-dependent opsin-expressing vector into the dorsal striatum of genetically modified mice. These injections were conducted in D1-Cre and D2-Cre transgenic mouse lines to allow for cell-type–specific expression of the light-sensitive channelrhodopsin-2 (ChR2) in either direct or indirect pathway neurons. This approach enables selective optical activation of distinct dopaminergic pathways critical to understanding reinforcement-driven behavior.

**i). Animal Screening and Preoperative Planning:** Mice were first screened for overall health, appropriate age (6–24 weeks), and weight (18–30 grams), and genotypes were verified through PCR-based genotyping (*Transnetyxx, Cordova, TN*). Only animals that were healthy, fully mobile, and confirmed to carry the appropriate CRE allele (either D1-Cre or D2-Cre) were selected for surgical intervention. Animals were housed under standard conditions (12-hour light/dark cycle, food and water ad libitum) in a controlled environment.One day prior to surgery, surgical tools and materials were inspected and organized. All surgical instruments, including forceps, scalpels, scissors, and injection needles, were cleaned and sterilized. Injection needles were examined under a microscope to ensure that their tips were intact and free from debris. Bead sterilizers and ethanol baths were set up to ensure maintenance of aseptic conditions throughout the procedure.The viral vector *AAV5-EF1a-DIO-hChR2(H134R)-GFP* or *AAV5-EF1a-DIO-hChR2(H134R)-mCherry* (*Addgene, Watertown, MA*) was retrieved from cold storage and stored in a chilled container until the time of injection. This vector was selected for its ability to drive CRE-dependent expression of ChR2, fused with enhanced green/red fluorescent protein (GFP/m-Cherry), allowing both functional manipulation and verification of expression. Sterile Hamilton syringes (*Hamilton, Reno, NV*) were prepared for loading the viral construct under a laminar flow hood to maintain sterility.

**ii). Preparation of Surgical Environment:** The surgical setup included a Kopf small animal stereotaxic frame (*Kopf Instruments, Tujunga, CA*), an isoflurane vaporizer system (*EZ Systems, Cresskill, NJ*), an oxygen tank (*Airgas, Jefferson City, MO*), and a thermally regulated heating pad (*Global Biotech Inc, Mount Laurel, NJ*) (maintained at 38–39°C) to prevent hypothermia. The surgical field was established using sterile drapes and pre-sterilized tools, and gloves were disinfected with 70% ethanol throughout the procedure. Each mouse was weighed, and its baseline recorded in a pre-filled surgical log (*MU ACUC Rodent Surgery Log*), which also included virus lot number, injection coordinates, and notes for postoperative monitoring. Anesthesia dosage and analgesic requirements (e.g., buprenorphine) were calculated in advance.

**iii). Anesthesia and Mounting:** Mice were anesthetized using 3% isoflurane (*VetOne, Paris, France*) in an induction chamber and subsequently mounted onto the stereotaxic apparatus using ear bars and a bite bar for secure positioning. Isoflurane was reduced to 1.5–2% for maintenance. Depth of anesthesia was continuously monitored via respiration rate and absence of withdrawal reflexes. Ophthalmic ointment (*Stye Tech Solutions, Blue Bell, PA*) was applied to protect the corneas from drying and light exposure.

**iv). Cranial Preparation:** Hair over the scalp was removed using a depilatory cream (*Nair, Target*) and the skin was sterilized with alternating applications of betadine and 70% ethanol, repeated three times. A midline incision approximately 1.5 cm in length was made to expose the skull. Periosteal tissue was cleared with sterile cotton swabs and saline to allow for clear identification of the bregma and lambda anatomical landmarks. The skull was leveled such that bregma and lambda were aligned within 50 µm along the dorsoventral axis. Head tilt and lateral alignment were also corrected to ensure accurate stereotaxic targeting in three-dimensional space.

**v). Drilling and Targeting:** Using a micro-drill mounted to the stereotaxic manipulator, two burr holes (diameter ~0.6 mm) were drilled at the following bilateral coordinates relative to bregma: anterior-posterior (AP): +0.5 mm; medial-lateral (ML): ±1.5 mm. These coordinates targeted the dorsal striatum, a region critically involved in action selection and feedback-based learning.Care was taken to avoid over-penetration or skull damage, and any bone fragments were removed to create a clean path for the injection needle. Saline-soaked swabs were used to cool the skull during drilling and to irrigate debris from the exposed area.

**vi). Viral Injection Procedure:** A 32-gauge Hamilton syringe (#702) was mounted onto the stereotaxic arm and carefully aligned over the burr hole. Under visual guidance, the needle was slowly lowered to a depth of 2.5 mm from the brain surface (dorsoventral axis). After reaching this depth, the needle was left in place for five minutes to allow the tissue to stabilize and reduce displacement pressure. The needle was then retracted slightly to a final injection depth of 2.5 mm, where 1.0 µL of virus was injected at a controlled rate of 0.1 µL/min using a microsyringe pump. Following injection, the needle remained in place for 10 minutes to allow for proper viral diffusion and to minimize backflow along the needle tract. The needle was then withdrawn slowly and carefully to prevent tissue disruption. The same procedure was repeated for the contralateral hemisphere. Between injections, the needle was cleaned with sterile saline and ethanol.

**vii). Closure and Recovery:** Once both injections were completed, burr holes were sealed with a biocompatible silicone elastomer, Kwik-Cast (*World Precision Instruments, Sarasota, FL*). The incision was closed using VetBond tissue adhesive (*3M, Maplewood, MN*), and any residual blood or debris was gently cleaned from the surgical site. A subcutaneous injection of 0.5–1.0 mL of warm sterile saline was administered to prevent dehydration and support recovery.

**viii). Postoperative Care and Monitoring:** Immediately after surgery, mice were placed in recovery cages pre-warmed on one side to allow for thermal self-regulation. Animals were monitored continuously until full ambulation and alertness were observed. Analgesia was provided using buprenorphine (0.01 mg/kg, s.c.) every 12 hours for 48 hours post-surgery. All animals were monitored daily for a minimum of 7 days post-operation. Parameters tracked included body weight, general activity, grooming behavior, wound healing, and any signs of infection or discomfort. Surgical records were updated daily in compliance with ACUC protocols. Animals that exhibited signs of poor recovery, implant failure, or neurological impairment were excluded from behavioral testing. Successful expression of ChR2-GFP/ChR2-mCherry was later verified via fluorescence imaging in a subset of animals. Several quality control measures were implemented throughout the procedure to ensure reproducibility and success. These included precise stereotaxic alignment, validation of injection depth using anatomical references, and constant flow-rate control during virus infusion. Additionally, the use of a retraction step prior to injection helped minimize tissue pressure, improving the consistency of viral spread. Mice with confirmed recovery, stable health, and verified opsin expression were subsequently enrolled in behavioral and optogenetic stimulation protocols. This method allowed for selective and reversible manipulation of either D1- or D2-expressing neurons within the dorsal striatum, enabling downstream analysis of pathway-specific contributions to learning, motivation, and decision-making.

**B). Task Environment and Olfactory System**

Behavioral testing was conducted in a custom-fabricated operant chamber measuring approximately 7 × 7 × 7 inches. Two ports were installed on one of the chamber walls: an odor delivery port and a water reward port, placed side by side to streamline behavioral responses. The close arrangement of these ports allowed animals to quickly shift between odor sampling and reward retrieval, reducing latency due to locomotion and improving the precision of trial-based assessments. The delivery of olfactory cues was managed by a multi-channel, computer-interfaced odor delivery system housed outside the behavioral chamber. This system was powered by high-purity, dry compressed air that was first regulated for pressure consistency before being split into two primary airflow streams. One stream served as the clean air source used for odor dilution, while the second stream fed into the odorant channels. The odorant stream branched into five separate tubing lines, each leading to a sealed glass vial. Four of these vials contained unique essential oil odorants, selected and rotated across sessions to provide variability in olfactory cues. The fifth vial remained empty and served as a neutral air channel used for clearing residual odors between trials. Each odor pathway was equipped with a solenoid valve that remained closed by default, ensuring that no odorant escaped unless triggered during a trial. When a mouse initiated a trial by inserting its snout into the odor port, an IR sensor (*GP1A57HRJ00F, Digikey, Thief River Falls, MN*) detected this interaction and communicated with an Arduino DUE (*Monza, Lombady, Italy*) microcontroller programmed to randomly select one of the four active odor channels. Once selected, the corresponding solenoid valve opened, allowing odorized air to pass into the output line. At a T-shaped connector downstream, the odorized air was combined with a steady stream of clean air to achieve consistent dilution. This process ensured that odor concentration remained at a behavioral threshold—detectable, but not overpowering—thus reducing the chance of aversion or sensory fatigue. The resulting odor-air mixture was then delivered into the odor port, where the animal could sample the stimulus before making a behavioral decision. The system’s design allowed precise timing of odor onset and offset, aligning closely with behavioral responses to facilitate accurate trial-by-trial analysis. To maintain olfactory clarity, the system defaulted to the neutral air channel between trials. This neutral line flushed the odor pathways and delivery tube, effectively resetting the system and minimizing residual odor carryover. By using this approach, each new trial began with a consistent sensory baseline, critical for evaluating learning and decision-making processes based on olfactory cues.

**C). Olfactory Discriminatory Go-NoGo Task (with and without Optogenetic Stimulation)**

The olfactory discriminatory Go-NoGo task is a structured behavioral paradigm designed to assess sensory discrimination, decision-making, and the effects of neuromodulation on motivated behavior in mice. This protocol uses a multi-phase training structure that gradually builds the cognitive and motor demands on the animal, while ensuring reliable trial engagement and reproducible task performance. Following recovery from viral injections or implant surgeries, mice are water-restricted and trained in the training chamber using custom software to control stimuli, record performance, and synchronize optogenetic stimulation and electrophysiological data collection. The training system consists of abehavioral chamber equipped with an odor port, water reward port, infrared sensors, a solenoid-controlled water delivery system, camera-based video recording, and a head-fixation platform for electrophysiological and optogenetic studies. Behavioral timing, stimuli control, and response logging are handled through a combination of Arduino microcontrollers and Python-based graphical interfaces. The behavioral shaping protocol consists of four major phases. The first three phases focus on habituation and task structure acquisition, while the fourth phase introduces odor discrimination and neuromodulatory manipulation.

***Phase 1: Water Port Exploration and Reward Association***The initial phase of training introduces the mouse to the operant chamber and the water reward port. The goal is for the animal to explore and discover that licking into the water port results in a small water reward (5–10 μL) accompanied by an auditory beep. The inter-trial interval is randomized to encourage exploration and discourage persistent staying at the port. During this phase, no odor or stimulation is used. Mice typically consume up to 1 mL of water during this session. This stage ensures familiarity with the chamber, initial positive reinforcement, and builds motivation for future structured trials. Most animals require 1–2 sessions to confidently interact with the water port.

#### **Phase 2: Odor Port Trial Initiation** In the second phase, mice are required to initiate each trial by poking into the odor port. When the animal engages with the odor port, a clean airflow (odorless air) is released from an inactive odor pipeline, simulating the airflow sensation they will later experience during odor delivery. This action also enables access to the water port; only after correctly engaging the odor port will water be delivered upon poking the water port. This phase is essential to teach the trial structure: first nose-poke at the odor port, then reward access at the water port. Failure to interact with the odor port results in no reward. The sequence reinforces a causal chain of behavior and strengthens port-specific learning.

#### **Phase 3: Sustained Odor Port Engagement (Dwell Time Conditioning)** Once mice reliably perform the port sequence, a minimum dwell time is enforced at the odor port. Initially set at 50 ms, this requirement increases gradually (up to 700 ms) across sessions. This delay mimics future odor processing times and ensures animals engage intentionally with the odor stimulus, rather than responding reflexively. Premature withdrawal from the odor port results in an aborted trial and no reward. Successfully holding for the required time triggers an auditory cue and enables access to the water reward. This phase prepares the animal for the timing structure of odor discrimination and ensures sensory processing precedes action selection.

### *****Phase 4: Odor Discrimination Task: Phase 4 (Without Stimulation)***** With task structure acquired, animals progress to full odor discrimination training. Each session includes four distinct odorants, randomly presented through the odor port. Two odors are paired with water reward (Go odors), and two odors are not rewarded (NoGo odors). During a Go trial, the mouse is expected to transition from the odor port to the water port upon odor detection to receive a reward. A correct Go response triggers a beep and water delivery. During a NoGo trial, the correct response is to withhold movement—remaining at the odor port or disengaging without attempting reward access. Correct NoGo responses also trigger a beep, but no water. Incorrect responses result in a buzz sound and a time-out period (5–15 seconds) before the next trial can begin. Over multiple sessions, animals begin to learn that only certain odors are worth responding to. Go performance typically starts high due to water motivation. True discrimination is marked by suppression of NoGo responses over time. Odor IDs, response latencies, nose-poke duration, and trial outcomes are recorded in real time. Sessions are video recorded for verification and detailed behavioral analysis.

### D). Implantation Surgery

To enable both optogenetic stimulation and simultaneous electrophysiological recording in freely moving transgenic mice, we implemented a comprehensive bilateral implantation protocol using a custom-built device known as an optrode. This device integrates an optical fiber with a tungsten microelectrode to facilitate concurrent light delivery and neural activity recording from genetically defined cell populations. These procedures were carried out under strict aseptic conditions and were approved by the Institutional Animal Care and Use Committee (IACUC). The optrode was fabricated in-house through a meticulous multistep process. The optical fiber used had a core/cladding diameter of 105/125 μm (*Thorlabs, Newton, NJ*). Following the removal of the protective polymer cladding with a chemical stripper, the proximal end of the fiber was coupled the electrode using UV-cured epoxy (*Norland Products Inc, Jamesburg, NJ*), which was then attached to a plastic ferrule using a heat cured torr seal (*Santa Clara, CA*). This provided a robust mechanical interface and ensured high-efficiency coupling to a 473 nm diode-pumped solid-state (DPSS) laser (*Doric Neurosciences, Quebec City, Canada*). Each fiber was optically validated to ensure a minimum transmittance of 70–80% of laser input, using an optical power meter placed at the distal tip. Only fibers meeting this benchmark were approved for integration. The optical fiber was aligned with a tungsten electrode (35-80 μm diameter, impedance ~500 kΩ) using a custom alignment jig to maintain parallel geometry. The two components were bonded using UV-curable epoxy **–** NOA81 (*Norland Products Inc, Jamesburg, NJ*) along their shafts, and their junction with the ferrule **-** CFLC128-10 (*Thor Labs, Newton, NJ*) was reinforced with Torr Seal (*Agilent, Santa Clara, CA*) epoxy to prevent mechanical failure during insertion or subsequent behavioral sessions. The final optrode unit was compatible with laser sources and data acquisition systems and terminated in an Omnetics 16-channel nanoconnector (*Omnetics, Minneapolis, MN*) connector. These connectors allowed streamlined integration with a multichannel neural signal amplifier, Open Ephys System (*Open Ephys, Atlanta, GA*), permitting simultaneous optical stimulation and electrical recording in vivo. Before use, assembled optrodes were tested for light output (post-coupling) and electrode impedance in saline to ensure device functionality. Validated optrodes were then UV-sterilized and stored in sterile containers prior to surgery.

All implantation surgeries were conducted in a sterile environment, within a designated surgical suite equipped with a Kopf stereotaxic apparatus, adjustable isoflurane vaporizer, and thermostatically controlled heating platform. Work surfaces were sanitized with chlorhexidine, and surgical tools were sterilized through autoclaving and subsequently disinfected with a bead sterilizer between surgeries. Sterile surgical supplies were prepared under a UV hood, and surgical drapes were laid out to establish a sterile field. On the day of surgery, mice were anesthetized with 3% isoflurane in an induction chamber and transferred to the stereotaxic frame, where anesthesia was maintained at 1.5–2% throughout the procedure. Ophthalmic ointment Stye (*Prestige Consumer Healthcare, Irvington, NY*) was applied to prevent corneal drying. Body temperature was continuously monitored with a rectal probe and regulated by a heating pad set at 37°C. The scalp over the cranial surface was shaved using depilatory cream (*Nair, Target*) and cleaned sequentially with povidone-iodine and ethanol (repeated three times).

A midline scalp incision (~10 mm) was made to expose the skull surface, and soft tissue was cleared to visualize bregma and lambda landmarks. The skull was aligned so that the dorsoventral displacement between bregma and lambda was less than 50 µm, ensuring flat skull positioning. Using stereotaxic coordinates (AP: 0.5 mm; ML: ±1.0 mm), bilateral burr holes were drilled over the dorsal striatum using a precision dental drill with saline irrigation to prevent thermal injury. Two additional burr holes were drilled for stainless steel skull screws (AP: 2.5 mm; ML: ±1.2 mm) to provide mechanical anchorage, and a final hole was made for a platinum reference wire. Once all burr holes were prepared, skull screws were inserted using micro-forceps, and the reference wire was secured with Kwik-Sil. The bone surface was then dried and treated with cyanoacrylate adhesive to minimize skin retraction during healing. A UV-sterilized optrode was mounted on the stereotaxic arm and slowly lowered into the dorsal striatum to a depth of 2.2 mm. Light pulses were delivered through the fiber, and light-evoked neural activity was monitored to confirm ChR2 expression.

Only animals exhibiting light-evoked responses were selected for final implantation. Following confirmation, the optrode was anchored in place using Kwik-Sil at the base. Layers of dental acrylic, C&B-Metabond (*Parkell Inc, Edgewood, NY*) were then applied to secure the implant to the skull and encapsulate the Omnetics connector. A lightweight plastic protective ring (*Eppendorf, Hamburg, Germany*) was cemented around the implant to reduce exposure to mechanical damage during behavior. The procedure was repeated on the contralateral hemisphere to complete bilateral implantation. Once both optrodes were secured, final electrical connections were made to the data acquisition system. Wires were soldered to the Omnetics connector based on a predefined pin-out map (Omnetics 1251, intan RDH2132), and continuity was verified using a digital multimeter (*Southwire, Carrollton, GA*). After confirming functionality, the entire assembly was encased in dental acrylic for insulation and mechanical integrity. Mice were removed from the stereotaxic frame and placed into warmed recovery cages. Subcutaneous injections of sterile saline (0.5–1 mL) were administered to counter fluid loss, and analgesia was provided with buprenorphine (0.01 mg/kg).

Animals were monitored continuously until full recovery from anesthesia, typically within 30–45 minutes. Cages were arranged to provide a thermal gradient (half warm, half ambient) to allow the animal to self-regulate body temperature. Post-operative care involved daily monitoring for seven days, with assessments of body weight, food and water intake, wound healing, implant stability, and behavioral responsiveness. Any deviations from expected recovery were documented, and veterinary consultation was sought as needed. At the end of the recovery period (typically 10–14 days), mice underwent re-evaluation of optical and electrical implant performance. The light output from the implant was re-measured using the same optical power meter setup, and electrode impedances were verified. Animals exhibiting normal exploratory behavior and maintaining consistent weight were cleared for behavioral and electrophysiological experimentation.

### E). Verifying Implantation and Choosing the Laser Power: Rotation Test

To confirm the functional integrity of optogenetic implants and determine appropriate stimulation parameters, we employed a standardized behavioral assay known as the rotation test—a widely accepted method for validating opsin activation in sensorimotor pathways**.** This test allowed us to assess both the physical placement of the optrode and the efficacy of Channelrhodopsin-2 (ChR2)-mediated neuronal activation within the dorsomedial striatum (DMS). Given the well-established principle of contralateral sensorimotor control, where each hemisphere of the brain governs motor behavior on the opposite side of the body, unilateral stimulation of the DMS should evoke observable rotations contralateral to the site of stimulation. This provides a clear and quantifiable behavioral readout of successful targeting and expression.

Following a 3-week post-surgical recovery period, mice were individually placed in a clean, circular open-field arena to allow unrestricted movement. A 450 nm blue diode laser (*Doric, Quebec, Canada*) was connected to the implanted optical fiber via a patch cable and pulsed at 20 Hz with a 50% duty cycle, consistent with published parameters for ChR2 activation. Each hemisphere was stimulated independently by disconnecting the contralateral side, ensuring unilateral evaluation of opsin function. Behavioral responses were observed in real time and recorded manually, with some sessions also video-recorded for offline quantification. Rotational behavior was defined as consistent, directional circling and was clearly distinguishable from spontaneous exploratory locomotion.

To determine inclusion criteria, we established a behavioral threshold: animals had to exhibit at least five complete rotations within 30 seconds of light stimulation to qualify for further experiments. Stimulation intensity was initially set at low power and incrementally increased in 0.5–1.0 mW steps until reliable rotational behavior was observed. This intensity was documented as the threshold power for that mouse, and stimulation during behavioral experiments was subsequently delivered just below this threshold to avoid inducing overt motor artifacts that could confound task performance. Stimulus intensities were categorized as *below threshold* (no rotation), *threshold* (onset of rotation), and *clear rotation* (consistent circling).

In cases where no rotation was observed, we considered multiple factors that might contribute to failure: (1) misalignment or displacement of the fiber tip; (2) fibrotic tissue growth obstructing light transmission; (3) mechanical damage to the implant; (4) suboptimal viral transduction or poor expression of ChR2..

All validation results—including stimulation thresholds and behavioral observations—were recorded in a standardized log for consistency across sessions. These findings were cross-validated with postmortem histological analysis to confirm the anatomical accuracy of the fiber placement and the spatial extent of opsin expression within the targeted striatal region. The rotation test thus served as a rapid, behaviorally grounded screening tool, allowing us to verify optogenetic functionality, standardize stimulation parameters, and ensure the reliability of downstream behavioral and electrophysiological experiments.

**F). Open-Field Test**

To further evaluate the spatial preferences and exploratory tendencies of mice in response to pathway-specific neuromodulation, we conducted an Open-Field Test, a standardized sensorimotor assay. This test allowed us to assess whether optogenetic stimulation influenced general locomotor activity and exploratory behavior, particularly in relation to D1 or D2 pathway activation. By measuring the time spent in stimulated versus non-stimulated zones, we were able to quantify field preference, gaining insight into whether mice were drawn to or avoided regions associated with specific pathway stimulation. Specifically, we examined whether stimulation of the D1 pathway elicited approach behavior or whether D2 pathway activation prompted avoidance. These behavioral outcomes helped us determine stimulation thresholds that were effective in modulating neuronal circuits without producing overt motor effects, thereby maintaining the integrity of the experimental design for subsequent behavioral assays.

The open-field test was carried out in a controlled laboratory environment using a transparent rectangular chamber (approximately 40 × 40 cm) placed over a white background to maximize visibility. A dotted perimeter was drawn outside the chamber to demarcate the central zone, and lighting was carefully adjusted to eliminate shadows that might interfere with automated behavioral tracking. The laser fibers were suspended above the arena with adequate slack to avoid dislodging or restraining the animal during movement. A high-resolution camera (*Logitech, Lausanne, Switzerland*) connected to the behavioral computer was used for continuous video recording throughout the session.

Behavioral tracking was performed using a custom software setup consisting of an Arduino-based open-field tracking program and a Python-based analysis interface (Spyder 5). The Arduino code was uploaded to an Arduino DUE board for controlling the lase stimulus, and Pythoninterface was used to input animal metadata and session parameters. A reference frame was acquired at the beginning of the session by selecting a clean image with no shadows or lighting inconsistencies. Stimulation zones were pre-designated within the arena as Region 1 (R1) and Region 2 (R2) to facilitate alternating light delivery throughout the session. A consistent zone-assignment convention was followed across animals to standardize data analysis.

Before starting the test, fiber optic connectors implanted on the mouse's head were inspected for dust or damage, and laser power was calibrated to the previously determined threshold value from the rotational test. The fiber connections were standardized: Channel 1 was assigned to the right hemisphere and Channel 2 to the left. Each open-field session lasted for 15 minutes, excluding periods of grooming. The session was divided into five three-minute epochs. The first served as a baseline with no stimulation, allowing unrestricted exploration. Subsequent epochs alternated stimulation between region: 1 and region: 2 in a defined pattern (R1-R2-R1-R2), with real-time logging of stimulation onset, duration, and spatial alignment.This setup enabled precise temporal and spatial correlation between stimulation and behavior, allowing us to determine the influence of pathway-specific activation on exploratory decisions.

Mice that consistently spent more time in D1-stimulated regions or avoided D2-stimulated regions demonstrated stimulation-induced behavioral biases. We interpret the increased occupancy of D1 zones as a motivational response because no external reward was provided, yet animals repeatedly initiated approach and sustained engagement with the stimulation-paired area. Conversely, reduced occupancy of D2 zones reflects diminished motivational salience, since task performance and motor ability were intact, but animals systematically withdrew from the stimulation context. At the conclusion of each session, fibers were gently disconnected from the implant, and mice were returned to their home cages for recovery and post-session observation. These open-field assessments played a crucial role in validating our stimulation parameters and provided foundational behavioral data for interpreting task-related outcomes in the broader study.

**G). Training with Stimulation and Electrophysiology**

Once baseline odor discrimination is established, optogenetic stimulation is integrated into the task. In these experiments, odor 3 (Go) and odor 4 (NoGo) are paired with light stimulation. This design enables examination of how stimulation affects action execution and inhibition in a sensory-driven decision task.

- **Laser Control**: The Doric Studio interface is used to set laser parameters (20 Hz, dual-channel, TTL mode). Channel 1 (pink tape connector) is aligned to the right hemisphere.
- **Power Calibration**: Stimulation power is selected based on previous motor screening or electrophysiological thresholds, individualized to each animal.
- **Recording Setup**: Neural activity is recorded with an Intan headstage using OpenEphys.
- **Video Sync**: A USB camera captured the session, synchronized with behavioral and neural data.

Before the session, the odor set is selected from a list of 14 odor sets we used alternatingly in our study. Stimulus parameters and odor IDs are input into the software, and fibers are securely attached. Trials proceed as in non-stimulated sessions, but specific trials are accompanied by optical stimulation, triggered via TTL signals from the Arduino DUE board. Session details, including odor identity, stimulation condition, trial counts, and animal behavior, are logged after the session. The session is ended based on motivation-related stop criteria mentioned below. Throughout training, animal welfare and motivation are closely monitored. Sessions are terminated if any of the conditions below are satisfied:

1. The mouse consumes at least 1 mL of water.
2. Fewer than 3 trials are initiated within 1 minute.
3. The mouse attempts to jump or escape from the chamber.

These guidelines prevent overtraining, preserve motivation across days, and ensure ethical use of the animal.

### ****H). Post-Training and Generalization****

### Trained mice may be tested on new odor sets to evaluate flexibility and generalization. Animals typically learn new NoGo odors within 2–3 sessions. For efficient statistical analysis of our data, animals were trained on a minimum of 5 odor sets. The paradigm allows long-term participation across variable conditions, contributing robust behavioral data for both learning and neuromodulation experiments. In sum, this protocol provides a powerful tool for dissecting the neural mechanisms of sensory-guided behavior and reinforcement learning, with precise control of stimuli, timing, and neural circuit modulation.

**I). Histology**

To verify the location and expression of opsins delivered via viral injections, postmortem histological analysis was conducted on coronal brain sections. Following completion of behavioral experiments, animals were euthanized, and brains were harvested and stored in 30% sucrose solution for at least 48 hours to ensure cryoprotection. Brains that had fully sunk to the bottom of the sucrose solution were selected for sectioning.

On the day of histology, brains were trimmed to remove the olfactory lobes and brainstem, leaving only regions of interest for analysis. A small portion of the left hemisphere was also trimmed to distinguish hemispheres during imaging. Brains were mounted on a precooled microtome stage using a flat bed of sucrose and sliced into coronal sections at the desired thickness. Slices corresponding to the dorsomedial striatum were carefully collected and placed into PBS-filled well plates for further processing.

Brain sections were mounted on glass slides using a fine paintbrush, rinsed in PBS, and carefully placed to maintain tissue orientation. After drying under a laminar hood, sections were cover slipped using DAPI mounting medium (*Sigma Aldrich, St. Louis, MO*) to visualize nuclei and enhance structural contrast. Edges were sealed with transparent nail polish to prevent drying.

Slides were imaged the following day using fluorescence microscopy to confirm both the location and intensity of opsin expression. These histological findings were cross-referenced with the behavioral and stimulation data to validate the accuracy of viral targeting and implant placement within the dorsomedial striatum.Top of FormBottom of Form

**J). Data Analysis**

**a). Open-Field Test Analysis** - Behavioral data from the open-field test were processed using custom MATLAB scripts developed in-house. The analysis categorized time spent in three zones—reference (baseline), stimulation, and non-stimulation—based on region identifiers labeled as ‘ref,’ ‘left,’ and ‘right.’ Data were pooled across animals, and statistical parameters such as mean, standard deviation, and standard error of the mean (SEM) were computed for each condition. Group comparisons were visualized through bar plots with error bars and color-coded representations (reference: green, stimulation: red, non-stimulation: blue). Independent two-sample t-tests were employed to assess statistical significance between conditions, including Reference vs. Stim, Stim vs. No Stim, and Reference vs. No Stim. These analyses enabled quantification of spatial preferences under optogenetic stimulation and provided insight into exploratory behavior modulated by D1 or D2 pathway activation.

**b). Go/No-Go Olfactory Task (Trial-by-Trial Performance Analysis)** - To assess how pathway-specific neuromodulation influenced learning and decision-making during the olfactory discrimination task, we developed a series of custom MATLAB scripts for comprehensive trial-by-trial behavioral analysis. Each behavioral session was parsed for odor identity, trial type (Go or No-Go), response outcome (Correct or Incorrect), stimulation status (D1, D2, or no stimulation), and timing parameters (odor onset, response latency, and reward delivery).

Using this structured dataset, we extracted multiple performance metrics: (1) Percentage Correct—quantifying overall accuracy for each odor type and trial condition; (2) Learning Curves—tracking accuracy trends across consecutive trials and sessions to assess acquisition and stabilization of the odor–response association; (3) Reaction Time (RT)—the latency between odor onset and initiation of a response, reflecting decision speed; and (4) Next Trial-Initiation Interval (NTIT)—the duration between the end of one trial and the initiation of the next. NTIT is widely used as a proxy for motivational engagement because shorter intervals indicate a stronger drive to re-engage with the task, whereas prolonged delays occur when animals are less motivated to pursue the next opportunity for reward. Each of these behavioral features was further stratified based on whether optogenetic stimulation was delivered during the trial, allowing for a condition-specific comparison between D1-stimulated and D2-stimulated odors with non-stimulated control trials. For odors paired with reward and stimulation, we evaluated whether D1 activation enhanced correct Go responses or accelerated learning. Conversely, we examined whether D2 activation during non-rewarded trials increased the accuracy of No-Go responses or altered suppression of incorrect actions. Data were aggregated across animals and plotted using smoothed learning curves, bar graphs, and pairwise comparison plots to visualize intra- and inter-group variability. Where applicable, statistical comparisons were made using paired or unpaired t-tests, and ANOVA to evaluate the significance of neuromodulatory effects on behavior. This detailed behavioral profiling enabled us to dissect the role of D1 and D2 pathways in modulating the learning process, decision latency, and behavioral flexibility in response to positive and negative feedback.
